# Supplementary material for: A novel gene silencing strategy based on tobacco rattle virus in Hibiscus mutabilis
Source: PeerJ journal article supplement (doi:10.7717/peerj.18211), 2024-10-07
Supplement: MIQE_checklist.xls [file MIQE_checklist.xls]

## Sheet: Sheet1
ITEM TO CHECK	IMPORTANCE	CHECKLIST
EXPERIMENTAL DESIGN
Definition of experimental and control groups	E	Line 151
Number within each group	E	Line 152-153
Assay carried out by core lab or investigator's lab?	D	NA
Acknowledgement of authors' contributions	D	Line 250
SAMPLE
Description	E	✓
Volume/mass of sample processed	D	OK
Microdissection or macrodissection	E	NA
Processing procedure	E	SM：Line 2
If frozen - how and how quickly?	E	SM：Line 2
If fixed - with what, how quickly?	E	NA
Sample storage conditions and duration (especially for FFPE samples)	E	SM：Line 4
NUCLEIC ACID EXTRACTION
Procedure and/or instrumentation	E	Line 153-154; Line 114-115
Name of kit and details of any modifications	E	Line 114-115
Source of additional reagents used	D	NA
Details of DNase or RNAse treatment	E	OK
Contamination assessment (DNA or RNA)	E	OK
Nucleic acid quantification	E	SM：Line 6-8
Instrument and method	E	SM：Line 6-7
Purity (A260/A280)	D	SM：Line 8
Yield	D	OK
RNA integrity method/instrument	E	⊙
RIN/RQI or Cq of 3' and 5' transcripts	E	⊙
Electrophoresis traces	D	OK
Inhibition testing (Cq dilutions, spike or other)	E	⊙
REVERSE TRANSCRIPTION
Complete reaction conditions	E	SM：Line 11-22
Amount of RNA and reaction volume	E	SM：Line 16
Priming oligonucleotide (if using GSP) and concentration	E	SM：Line 16
Reverse transcriptase and concentration	E	SM：Line 16
Temperature and time	E	SM：Line 21
Manufacturer of reagents and catalogue numbers	D	NA
Cqs with and without RT	D*	⊙
Storage conditions of cDNA	D	SM：Line 23
qPCR TARGET INFORMATION
If multiplex, efficiency and LOD of each assay.	E	⊙
Sequence accession number	E	Line 106
Location of amplicon	D	NA
Amplicon length	E	SM：Line 26
In silico specificity screen (BLAST, etc)	E	Line 167-171
Pseudogenes, retropseudogenes or other homologs?	D	NA
Sequence alignment	D	Figure 1
Secondary structure analysis of amplicon	D	⊙
Location of each primer by exon or intron (if applicable)	E	NA
What splice variants are targeted?	E	NA
qPCR OLIGONUCLEOTIDES
Primer sequences	E	Table 1
RTPrimerDB Identification Number	D	NA
Probe sequences	D**	NA
Location and identity of any modifications	E	NA
Manufacturer of oligonucleotides	D	SM：Line 28
Purification method	D	⊙
qPCR PROTOCOL
Complete reaction conditions	E	Line154-160
Reaction volume and amount of cDNA/DNA	E	Line 160
Primer, (probe), Mg++ and dNTP concentrations	E	Line159-160
Polymerase identity and concentration	E	Line159-160
Buffer/kit identity and manufacturer	E	Line159-160
Exact chemical constitution of the buffer	D	Line159-160
Additives (SYBR Green I, DMSO, etc.)	E	Line159-160
Manufacturer of plates/tubes and catalog number	D	SM：Line 30-31
Complete thermocycling parameters	E	Line157-158
Reaction setup (manual/robotic)	D	Line156-157
Manufacturer of qPCR instrument	E	Line156
qPCR VALIDATION
Evidence of optimisation (from gradients)	D	⊙
Specificity (gel, sequence, melt, or digest)	E	⊙
For SYBR Green I, Cq of the NTC	E	⊙
Standard curves with slope and y-intercept	E	⊙
PCR efficiency calculated from slope	E	⊙
Confidence interval for PCR efficiency or standard error	D	⊙
r2 of standard curve	E	⊙
Linear dynamic range	E	⊙
Cq variation at lower limit	E	NA
Confidence intervals throughout range	D	NA
Evidence for limit of detection	E	NA
If multiplex, efficiency and LOD of each assay.	E	NA
DATA ANALYSIS
qPCR analysis program (source, version)	E	Line161-163
Cq method determination	E	Line161
Outlier identification and disposition	E	⊙
Results of NTCs	E	NA
Justification of number and choice of reference genes	E	⊙
Description of normalisation method	E	Line 161
Number and concordance of biological replicates	D	Line 152
Number and stage (RT or qPCR) of technical replicates	E	Line 153
Repeatability (intra-assay variation)	E	NA
Reproducibility (inter-assay variation, %CV)	D	NA
Power analysis	D	NA
Statistical methods for result significance	E	NA
Software (source, version)	E	NA
Cq or raw data submission using RDML	D	NA
Table 1. MIQE checklist for authors, reviewers and editors. All essential information (E) must be submitted with the manuscript. Desirable
information (D) should be submitted if available. If using primers obtained from RTPrimerDB, information on qPCR target, oligonucleotides,
protocols and validation is available from that source.
*: Assessing the absence of DNA using a no RT assay is essential when first extracting RNA. Once the sample has been validated as
RDNA-free, inclusion of a no-RT control is desirable, but no longer essential.
**: Disclosure of the probe sequence is highly desirable and strongly encouraged. However, since not all commercial pre-designed assay
vendors provide this information, it cannot be an essential requirement. Use of such assays is advised against.
✓：Information is included in the text
OK：Test was performed but evidence is missing
⊙：Information is not available
NA：Not applicable
SM：Information is provided in supplamentary materials
