# Supplementary material for: A novel gene silencing strategy based on tobacco rattle virus in Hibiscus mutabilis
Source: PeerJ journal article supplement (doi:10.7717/peerj.18211), 2024-10-07
Supplement: TableS1.docx [file TableS1.docx]

Table S1 **The results of sequence identity.**

| Species | Accession Number | % Identity |
| --- | --- | --- |
| *Hibiscus hamobo*  *Gossypium_hirsutum* | QBR98254.1  NP_001314056.1 | 96.81  93.90 |
| *Gossypium_barbadense* | ABN13970.1 | 93.76 |
| *Theobroma_cacao* | EOY06359.1 | 93.48 |
| *Arabidopsis_thaliana* | NP_193291.1 | 87.74 |
| *Populus_tomentosa* | AGT02336.1 | 94.08 |
