# Supplementary material for: A novel gene silencing strategy based on tobacco rattle virus in Hibiscus mutabilis
Source: PeerJ journal article supplement (doi:10.7717/peerj.18211), 2024-10-07
Supplement: TableS2.xls [file TableS2.xls]

## Sheet: Sheet1
Table S2 The average Ct of q-PCR
Group	Ct of ACTIN			Average Ct of ACTIN	Ct of CLA1			Average Ct of CLA1	the CAL1 Expression Level
CAL1_1	24.88	24.71	25.17	24.92	24.76	24.56	24.46	24.5933	0.358213
CAL1_1	22.66	23.1	23.07	22.9433	24.38	24.31	24.29	24.3267	0.109491
CAL1_1	25.08	22.71	24.18	23.99	25.44	25.28	25.59	25.4367	0.104789
CAL1_2	23.54	24.58	24.31	24.1433	25.07	24.92	25.15	25.0467	0.152712
CAL1_2	24.55	22.79	23.89	23.7433	25.04	25.06	25.89	25.33	0.0950978
CAL1_2	24.18	24.14	23.94	24.0867	25.02	24.68	24.9	24.8667	0.166342
CAL1_3	24.82	24.5	24.46	24.5933	25.26	25.38	25.46	25.3667	0.167112
CAL1_3	24.39	23.11	24.07	23.8567	25.58	25.41	25.59	25.5267	0.0897604
CAL1_3	23.98	24.16	24.34	24.16	25.44	25.61	25.58	25.5433	0.109491
Mock	24.65	25.33	23.29	24.4233	22.87	22.46	22.68	22.67	0.962965
Mock	24.66	24.37	24.87	24.6333	22.68	22.75	22.87	22.7667	1.04166
Mock	24.8	24.82	24.5	24.7067	22.64	22.64	22.39	22.5567	1.26771
CK	23.77	24.71	24.23	24.2367	21.97	22.01	21.92	21.9667	1.37766
CK	24.47	24.33	24.3	24.3667	22.73	22.63	22.64	22.6667	0.928016
CK	24.16	23.62	23.42	23.7333	22.29	22.33	22.22	22.28	0.782171
Group	Ct of AFD2			Average Ct of AFD2	Ct of CLA1			Average Ct of CLA1	the CAL1 Expression Level
CAL1	24.59	24.5	24.49	24.5267	25.66	25.46	25.38	25.5	0.093069
CAL1	24.38	23.34	24.37	24.03	25.58	25.41	25.59	25.5267	0.0647539
CAL1	24.52	24.17	24.35	24.3467	25.6	25.48	25.58	25.5533	0.0791707
Mock	25.11	24.77	23.82	24.5667	22.87	22.46	22.68	22.67	0.867873
Mock	25.18	24.84	25.17	25.0633	22.68	22.75	22.87	22.7667	0.811627
Mock	25.21	25.22	24.94	25.1233	22.64	22.64	22.39	22.5567	0.938799
CK	25.54	25.29	25.11	25.3133	22.67	22.83	22.6	22.7	1.0784
CK	25.3	25.52	25.4	25.4067	22.98	22.93	22.86	22.9233	0.923738
CK	25.13	24.97	25.09	25.0633	22.83	22.86	22.72	22.8033	1.00386
